# Supplementary material for: Identification of different malaria patterns due to Plasmodium falciparum and Plasmodium vivax in Ethiopian children: a prospective cohort study
Source: Springer Nature journal article supplement (doi:10.1186/s12936-016-1253-2), 2016-04-14

Children

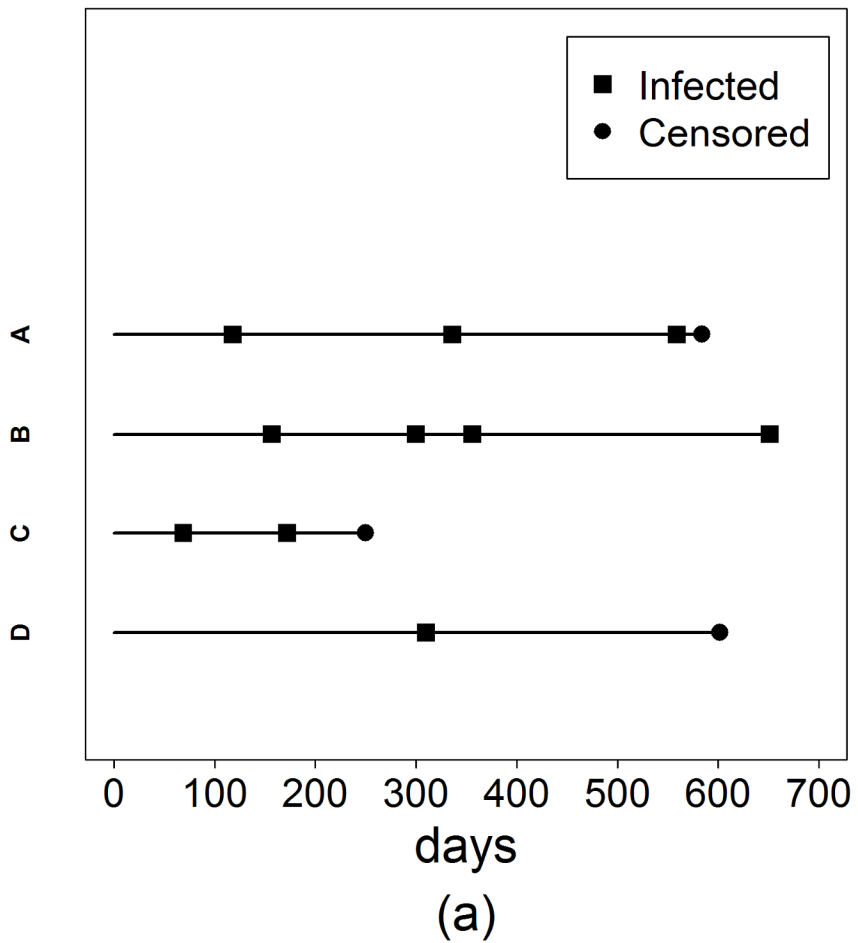

Children

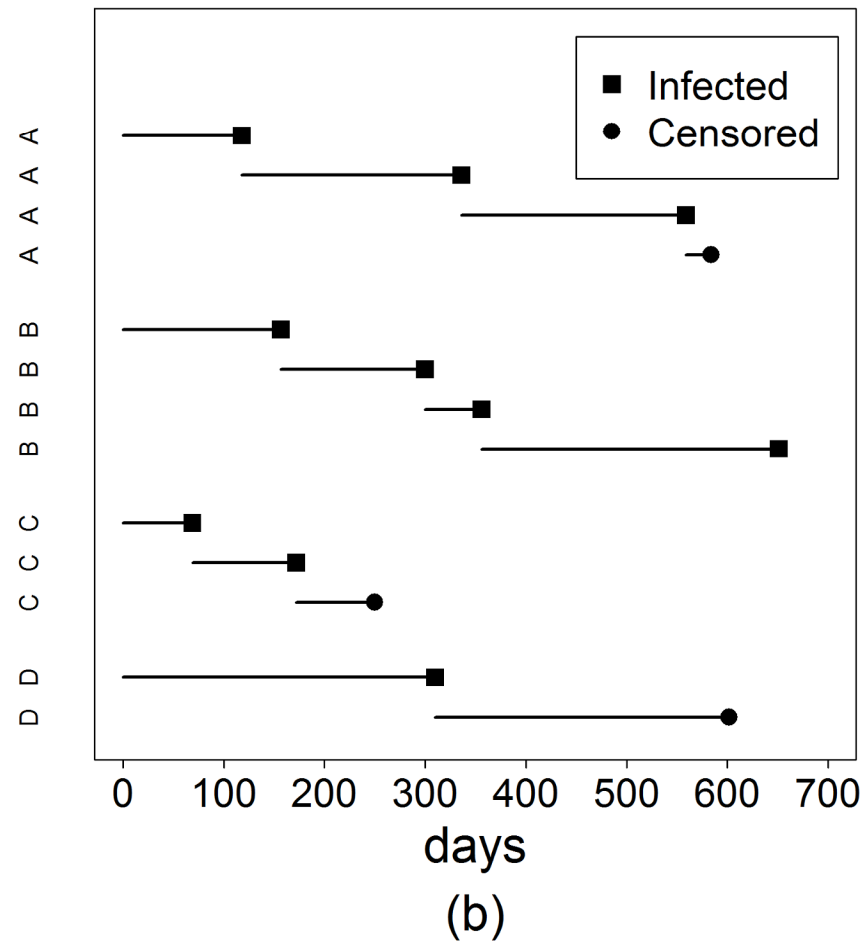

Supplement: MOESM1 [file 10027276]
